# Supplementary material for: Design and virtual screening of donor and non-fullerene acceptor for organic solar cells using long short-term memory model
Source: Royal Society of Chemistry journal article supplement (doi:10.1039/d4ta04665j), 2024-01-01
Supplement: d4ta04665j5.pdf [file d4ta04665j5.pdf]

## Supporting Information

### Design and Virtual Screening of Donor and Non-Fullerene Acceptor for Organic Solar Cells Using Long Short-Term Memory Model

Long-Fei Lv <sup>a</sup>, Cai-Rong Zhang <sup>a\*</sup>, Rui Cao <sup>a</sup>, Xiao-Meng Liu <sup>a</sup>, Mei-Ling Zhang <sup>a</sup>, Ji-Jun Gong <sup>a</sup>, Zi-Jiang Liu <sup>b</sup>, You-Zhi Wu <sup>c</sup>, Hong-Shan Chen <sup>d</sup>

<sup>a</sup> Department of Applied Physics, Lanzhou University of Technology, Lanzhou, Gansu 730050, China;

<sup>b</sup> School of Mathematics and Physics, Lanzhou Jiaotong University, Lanzhou 730070, China;

<sup>c</sup> School of Materials Science and Engineering, Lanzhou University of Technology, Lanzhou, Gansu 730050, China;

<sup>d</sup> College of Physics and Electronic Engineering, Northwest Normal University, Lanzhou, Gansu 730070, China.

\*Corresponding author.

E-mail address: [zhcrxy@lut.edu.cn](mailto:zhcrxy@lut.edu.cn) (C.R. Zhang)

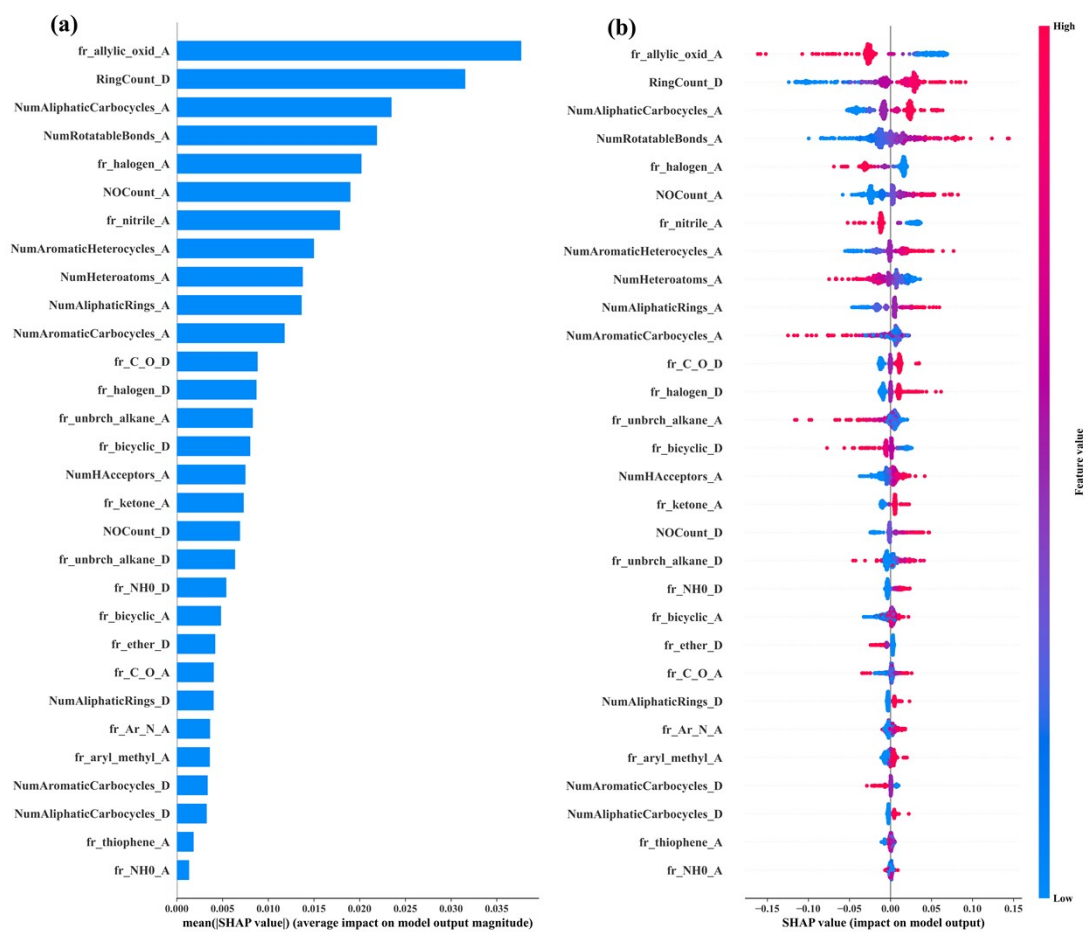

**Fig. S1** SHAP importance analysis of the 30 molecular structure descriptors used in the LSTM model for  $V_{OC}$  prediction

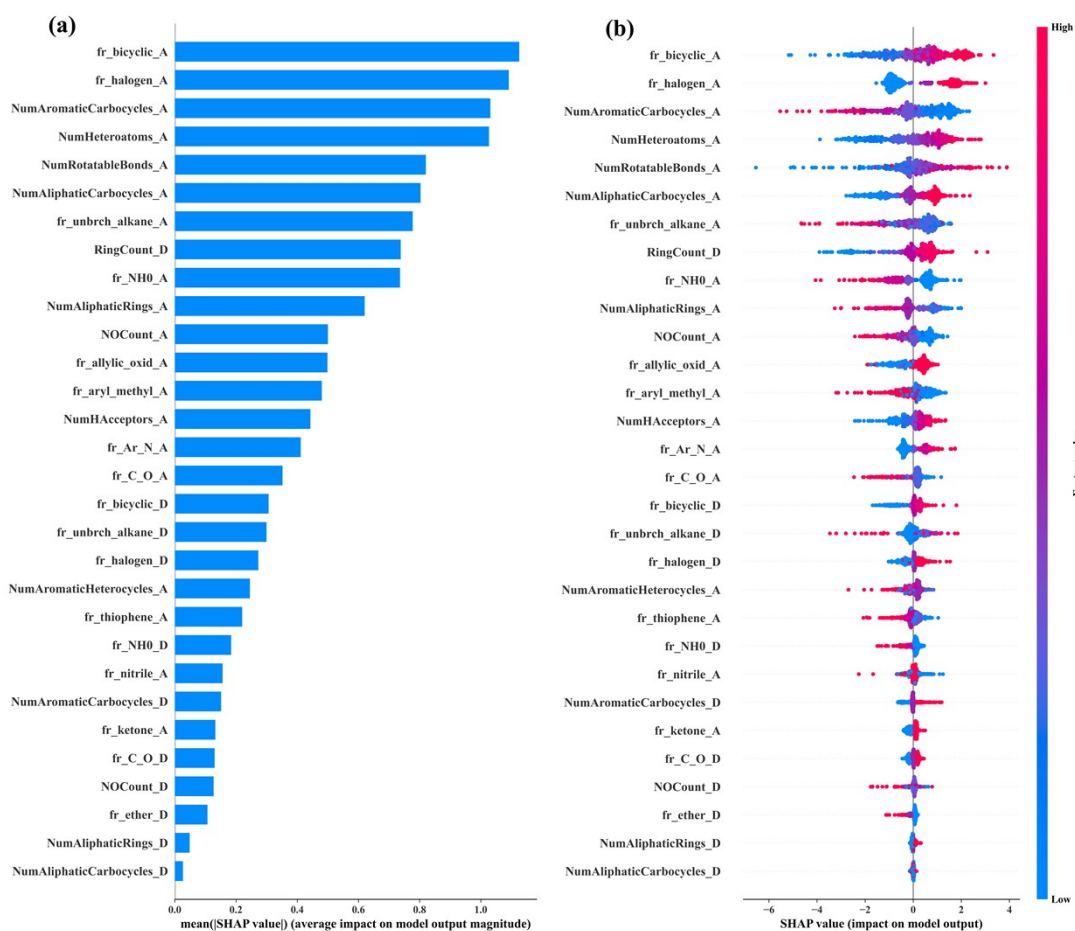

**Fig. S2** SHAP importance analysis of the 30 molecular structure descriptors used in the LSTM model for  $J_{SC}$  prediction

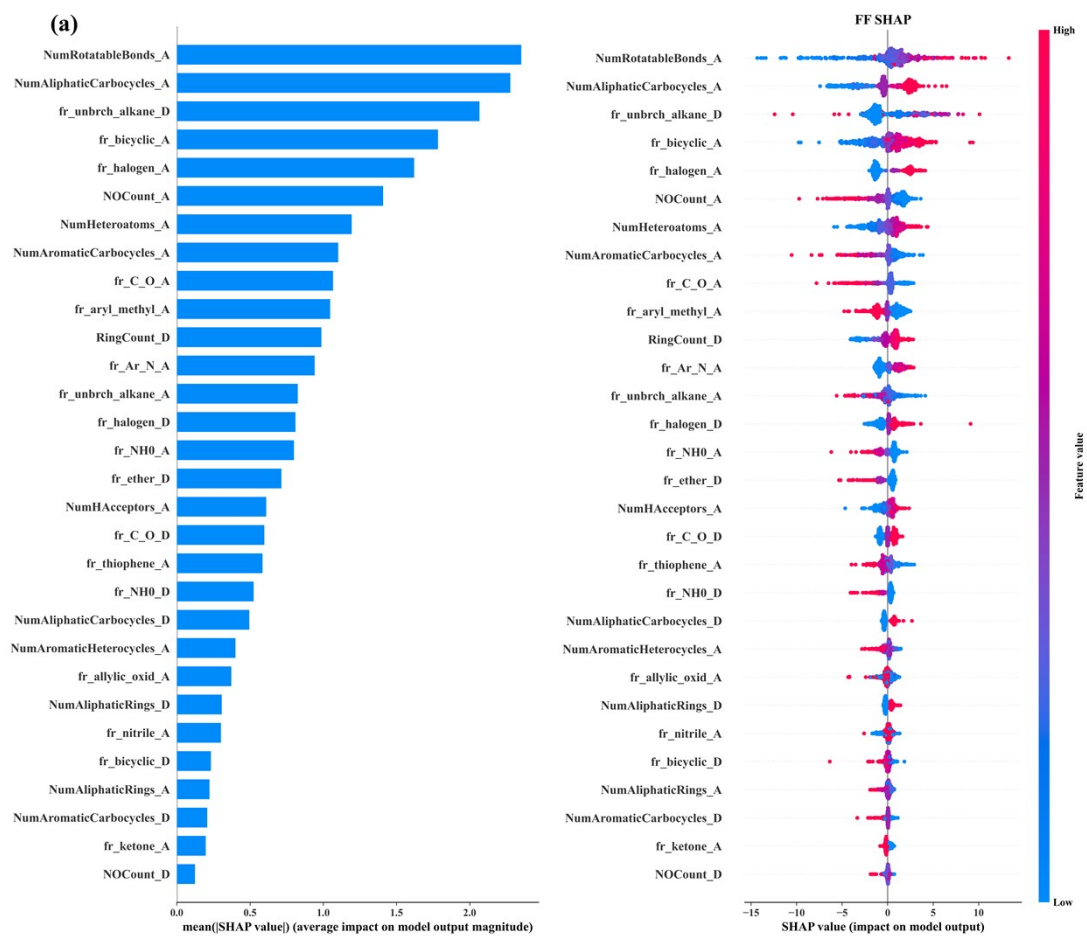

**Fig. S3** SHAP importance analysis of the 30 molecular structure descriptors used in the LSTM model for FF prediction

D

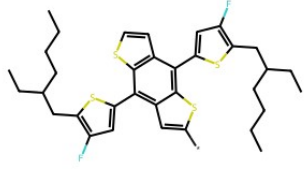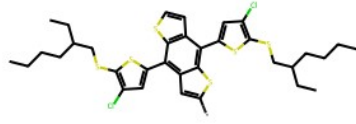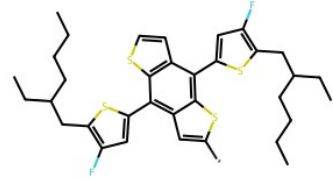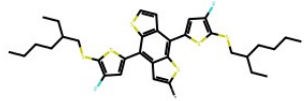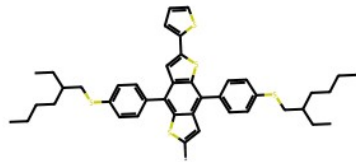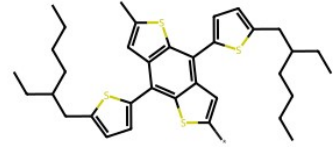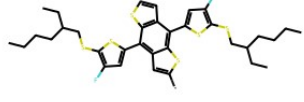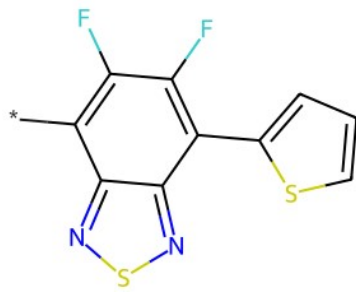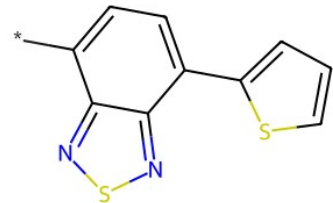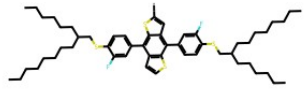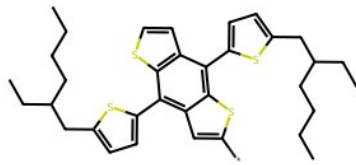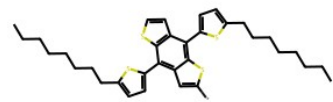

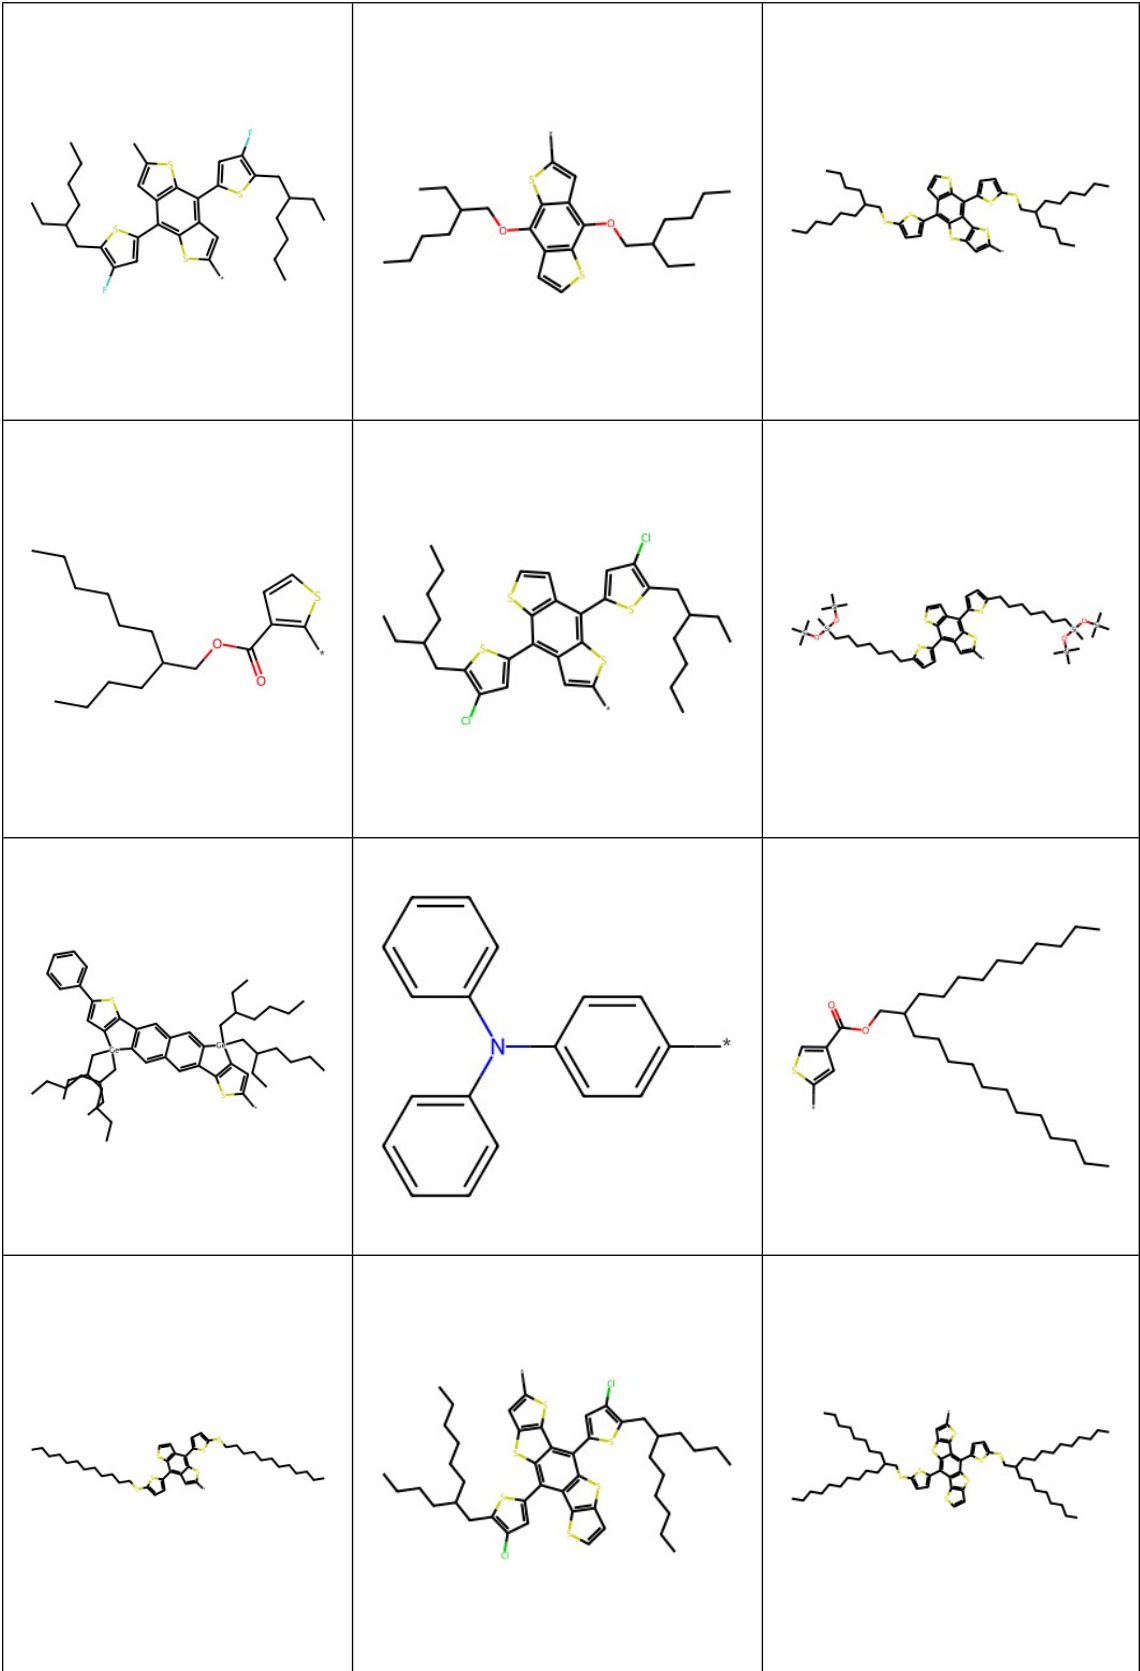

|                                                                                     |                                                                                     |                                                                                       |
|-------------------------------------------------------------------------------------|-------------------------------------------------------------------------------------|---------------------------------------------------------------------------------------|
|    |    |    |
|    |    |    |
|  |  |  |
|  |  |  |
| $\pi$                                                                               |                                                                                     |                                                                                       |

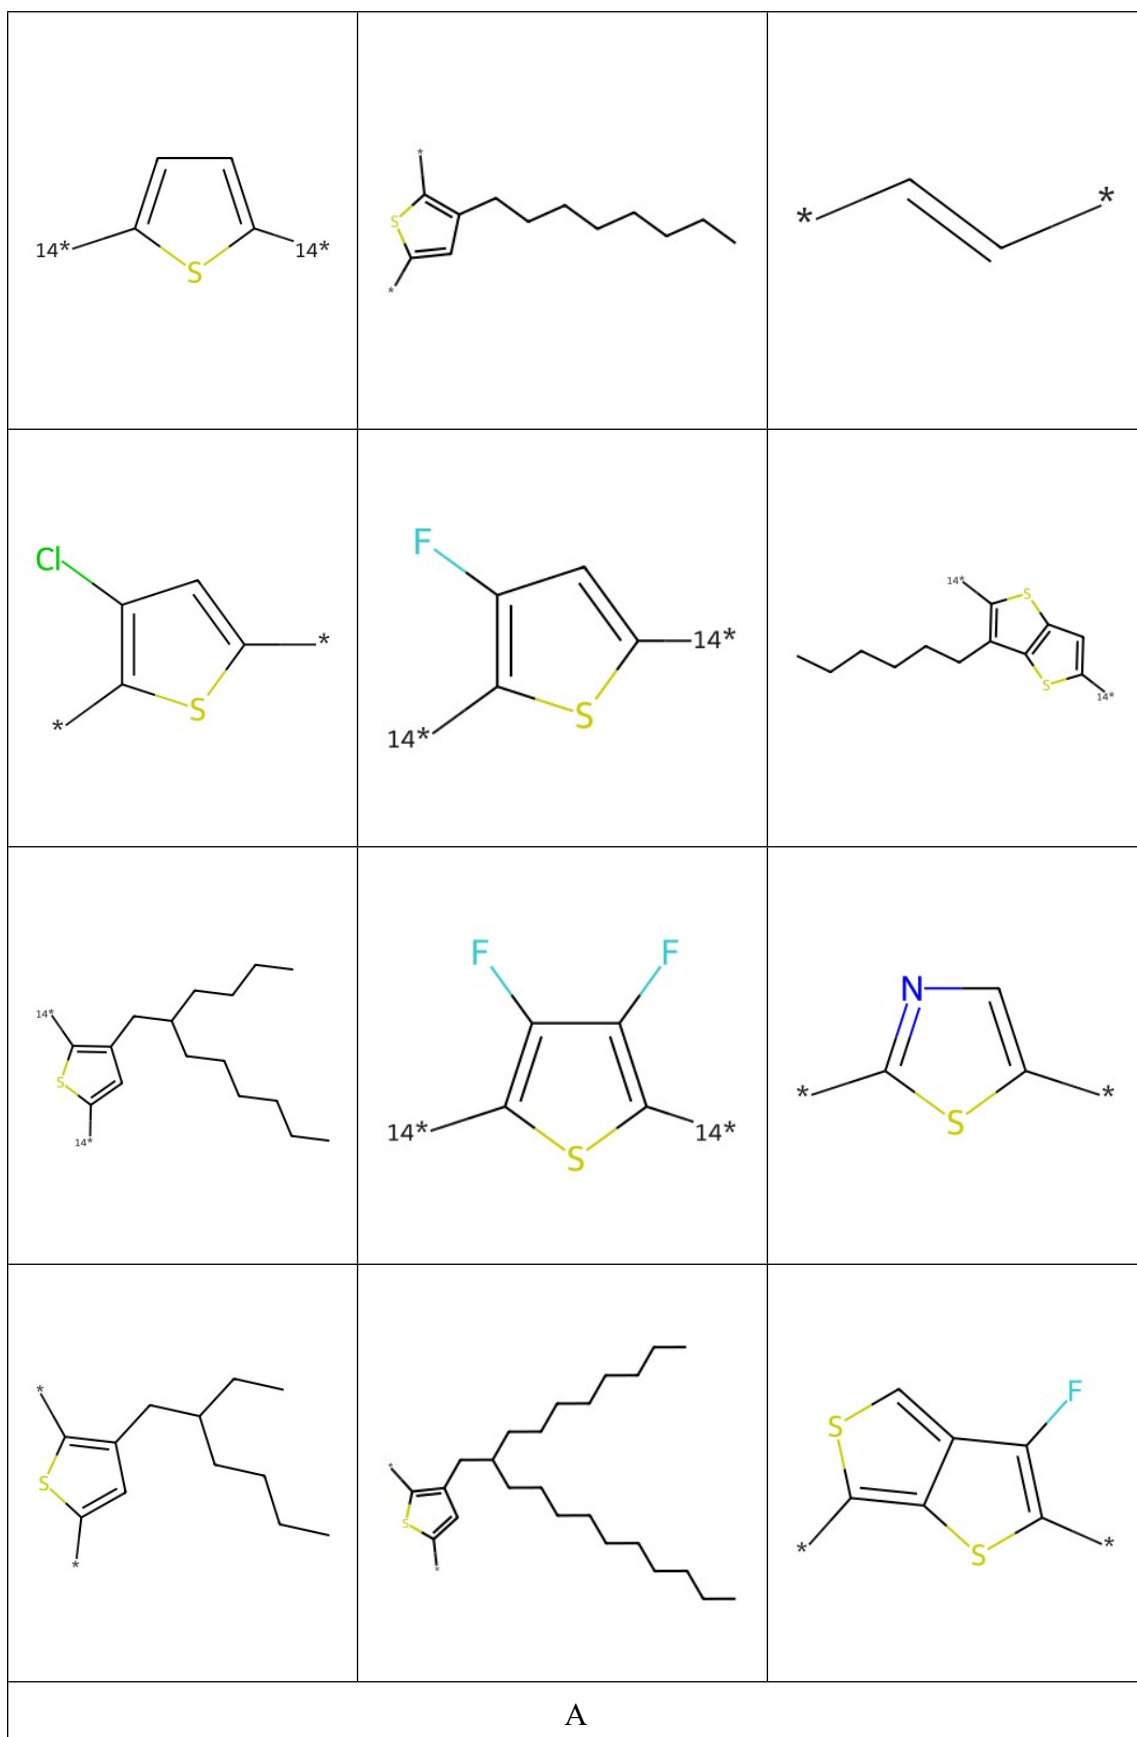



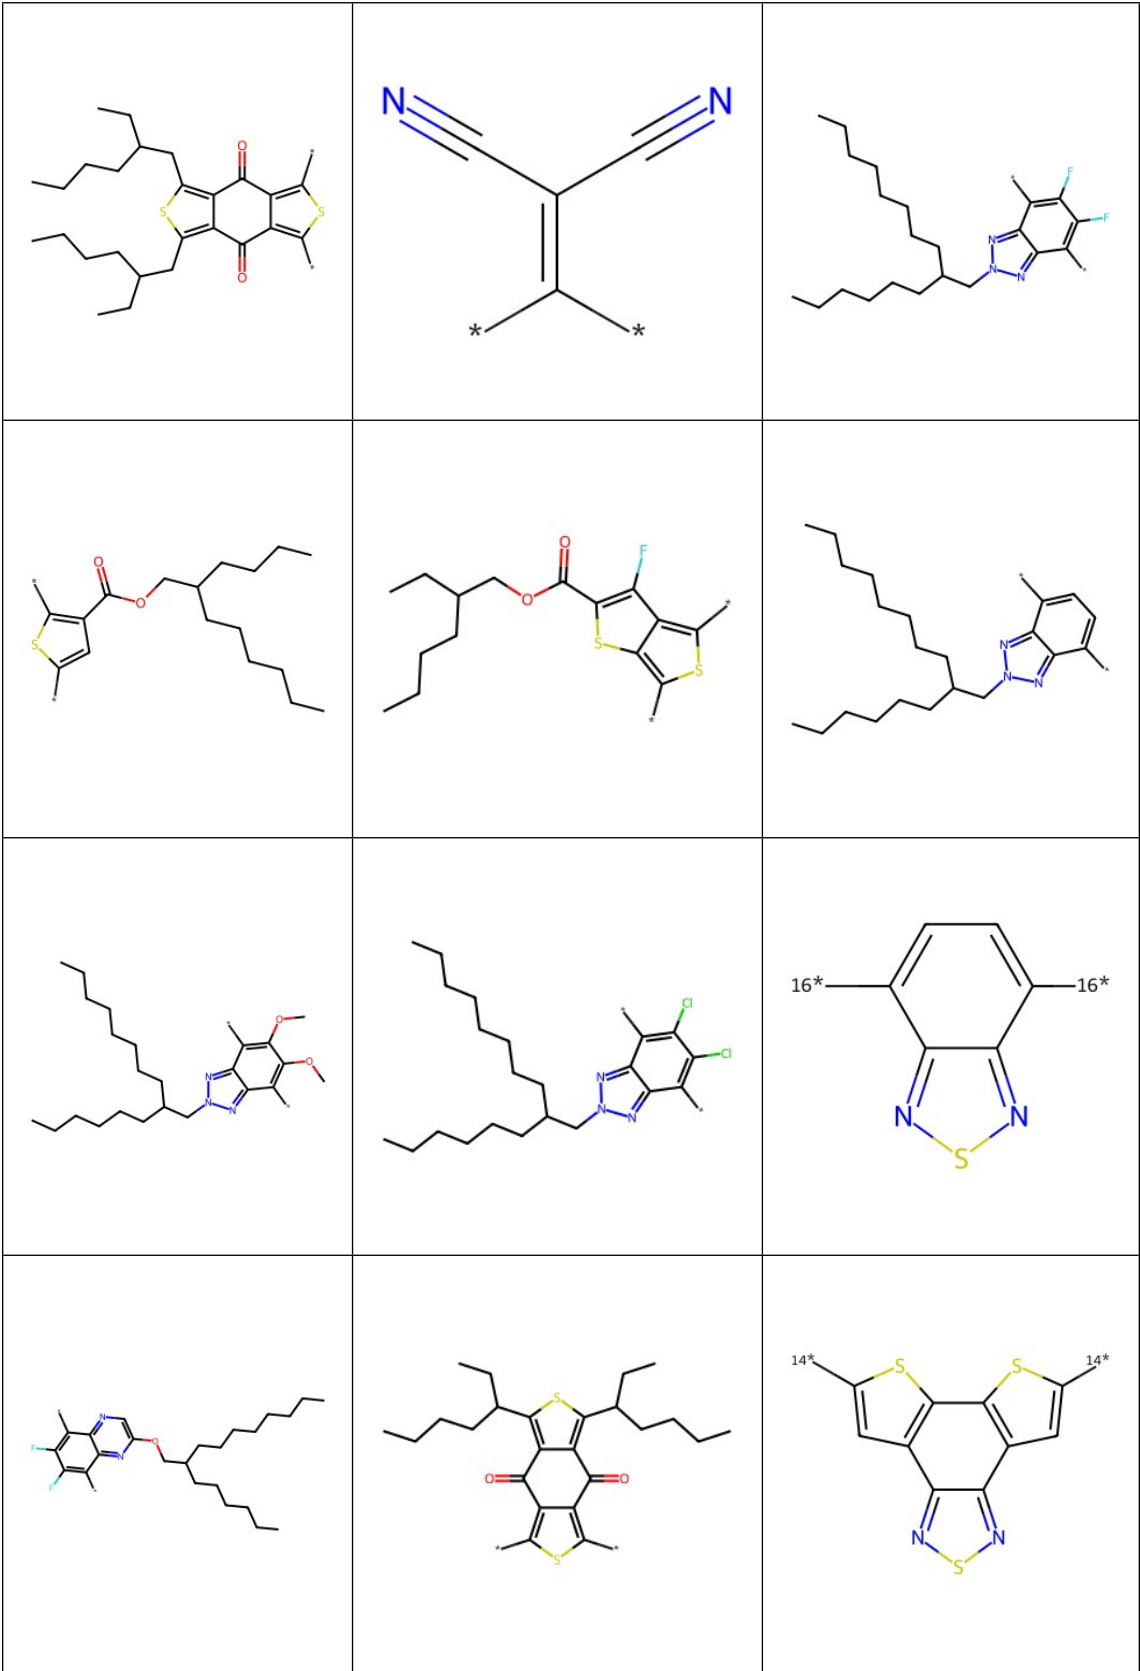

|                                                                                     |                                                                                     |                                                                                       |
|-------------------------------------------------------------------------------------|-------------------------------------------------------------------------------------|---------------------------------------------------------------------------------------|
| 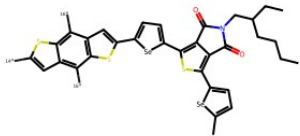   |    |    |
|    |    |    |
|  |  |  |
|  |  |  |

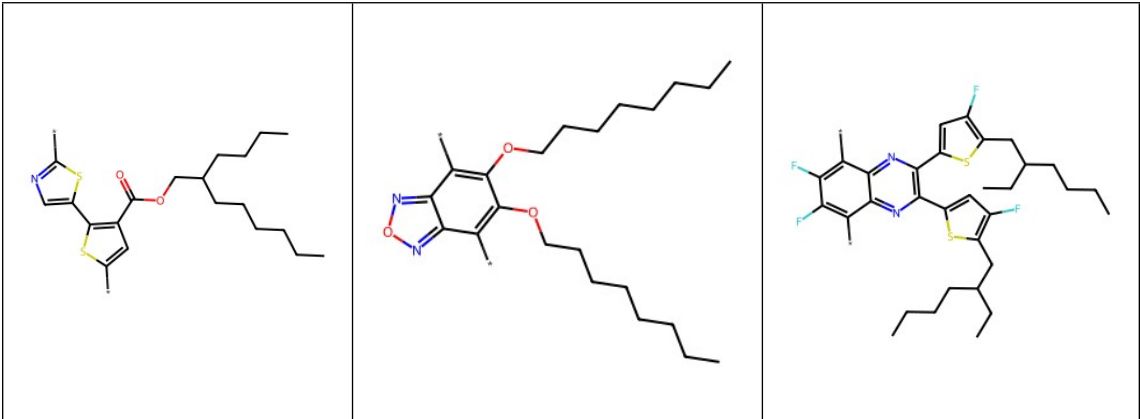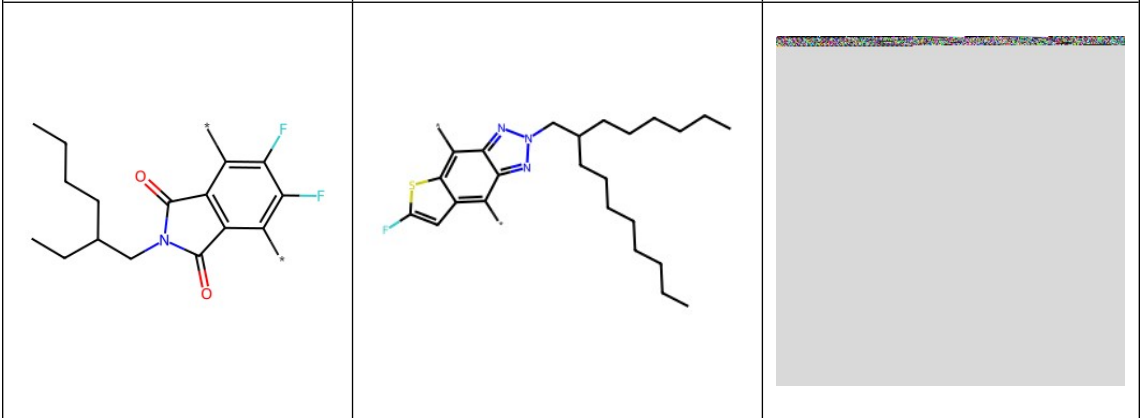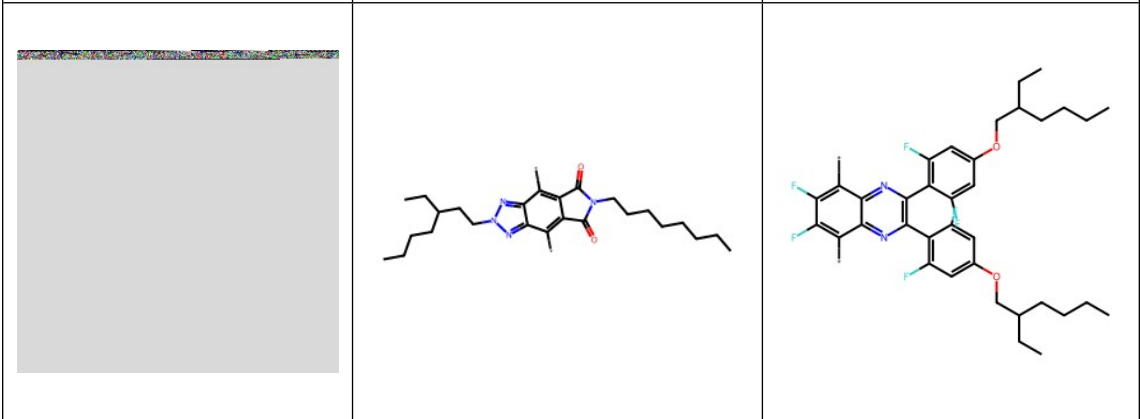

$\pi$

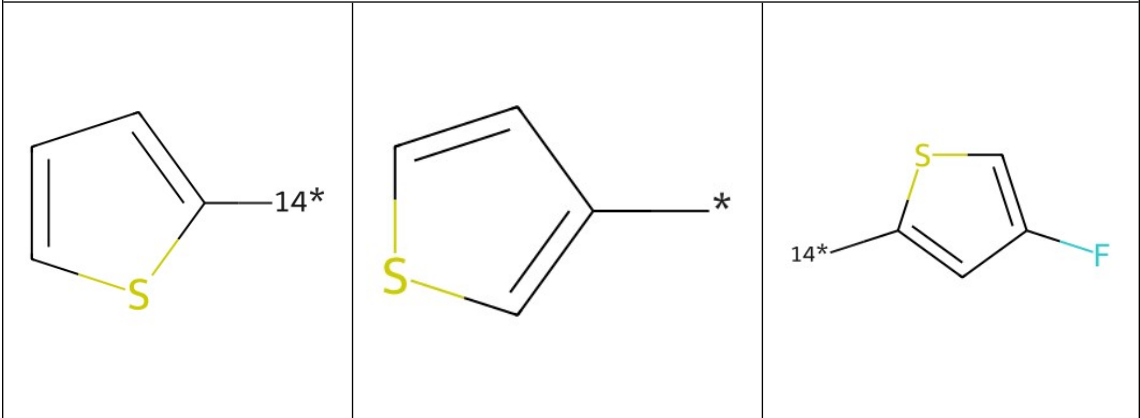

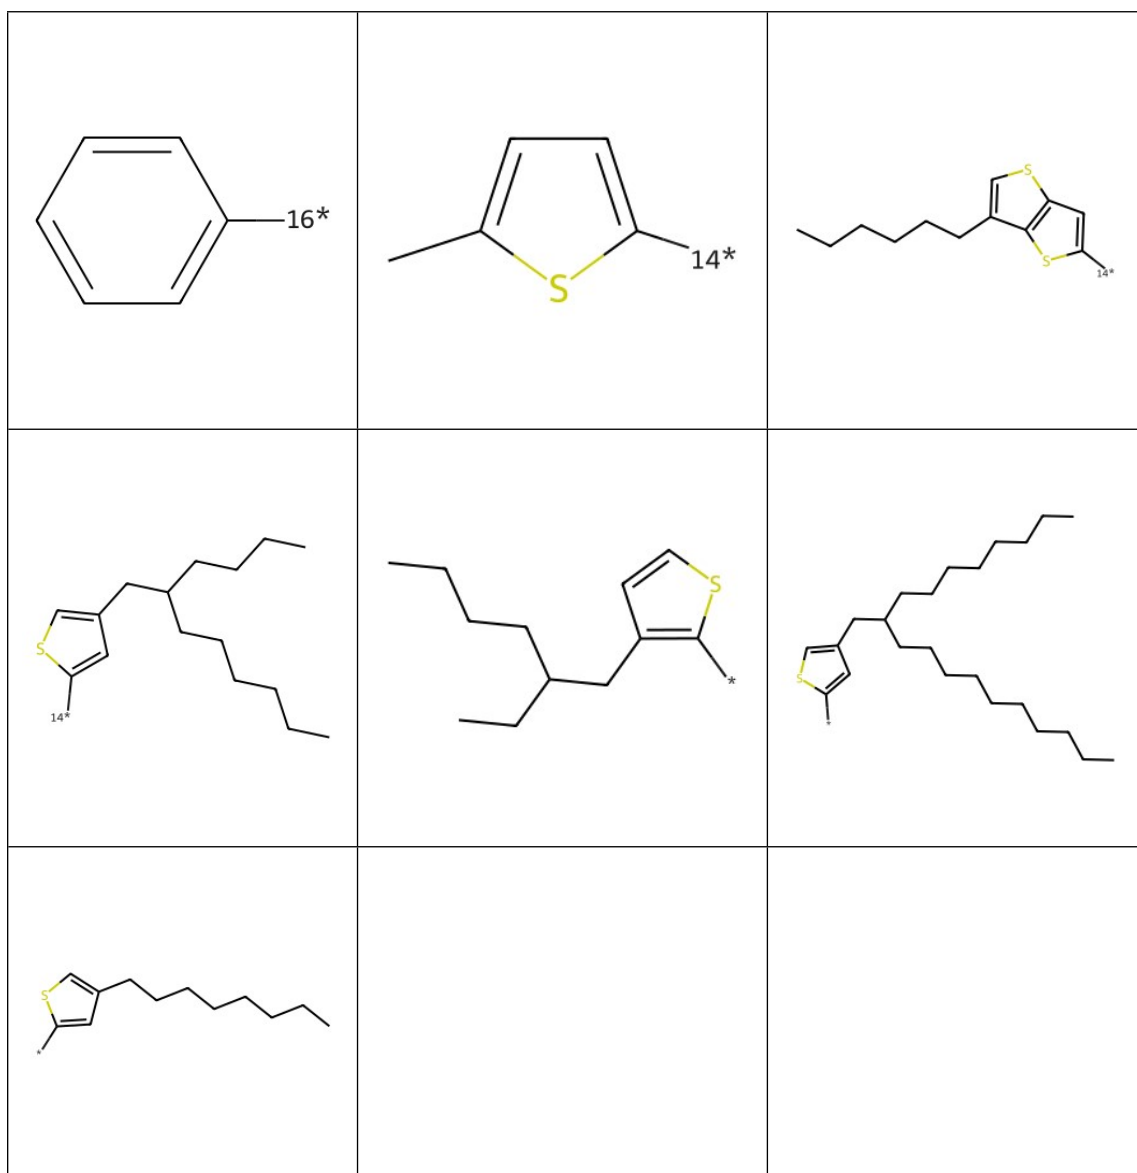

**Fig. S4** Fragments of donor molecules

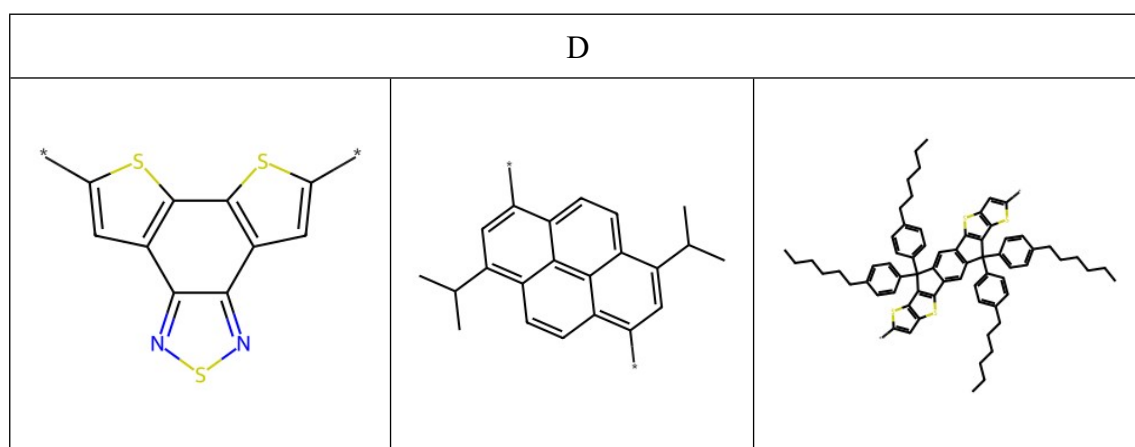

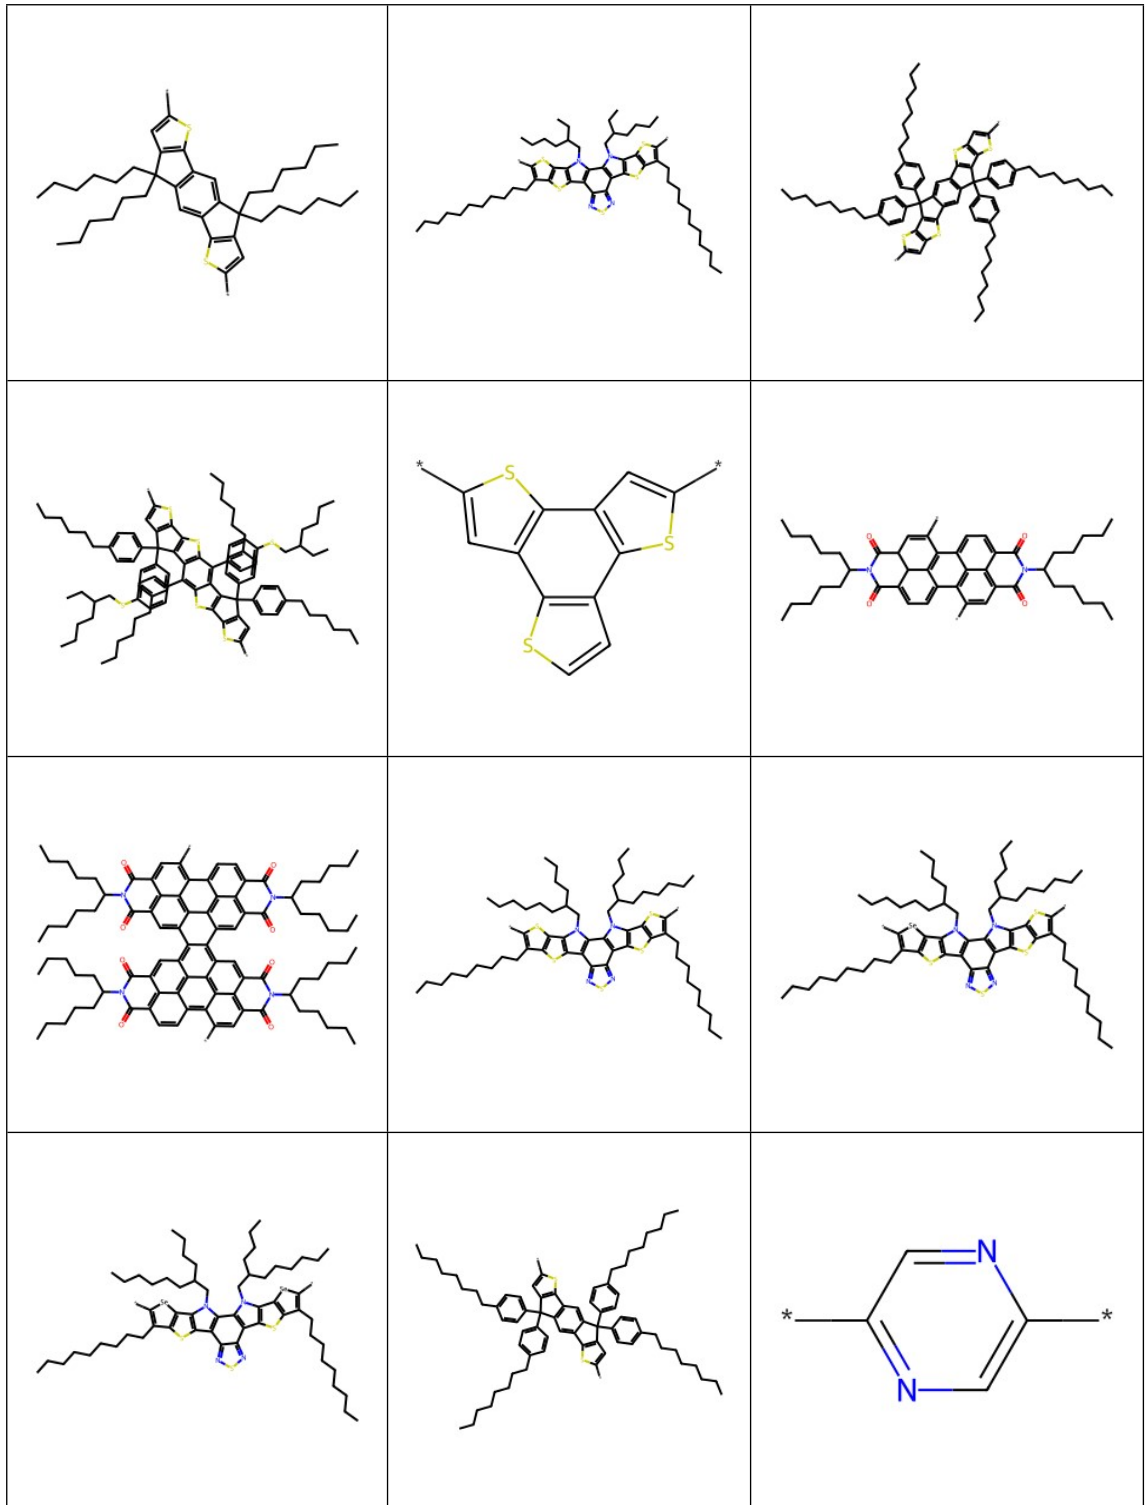

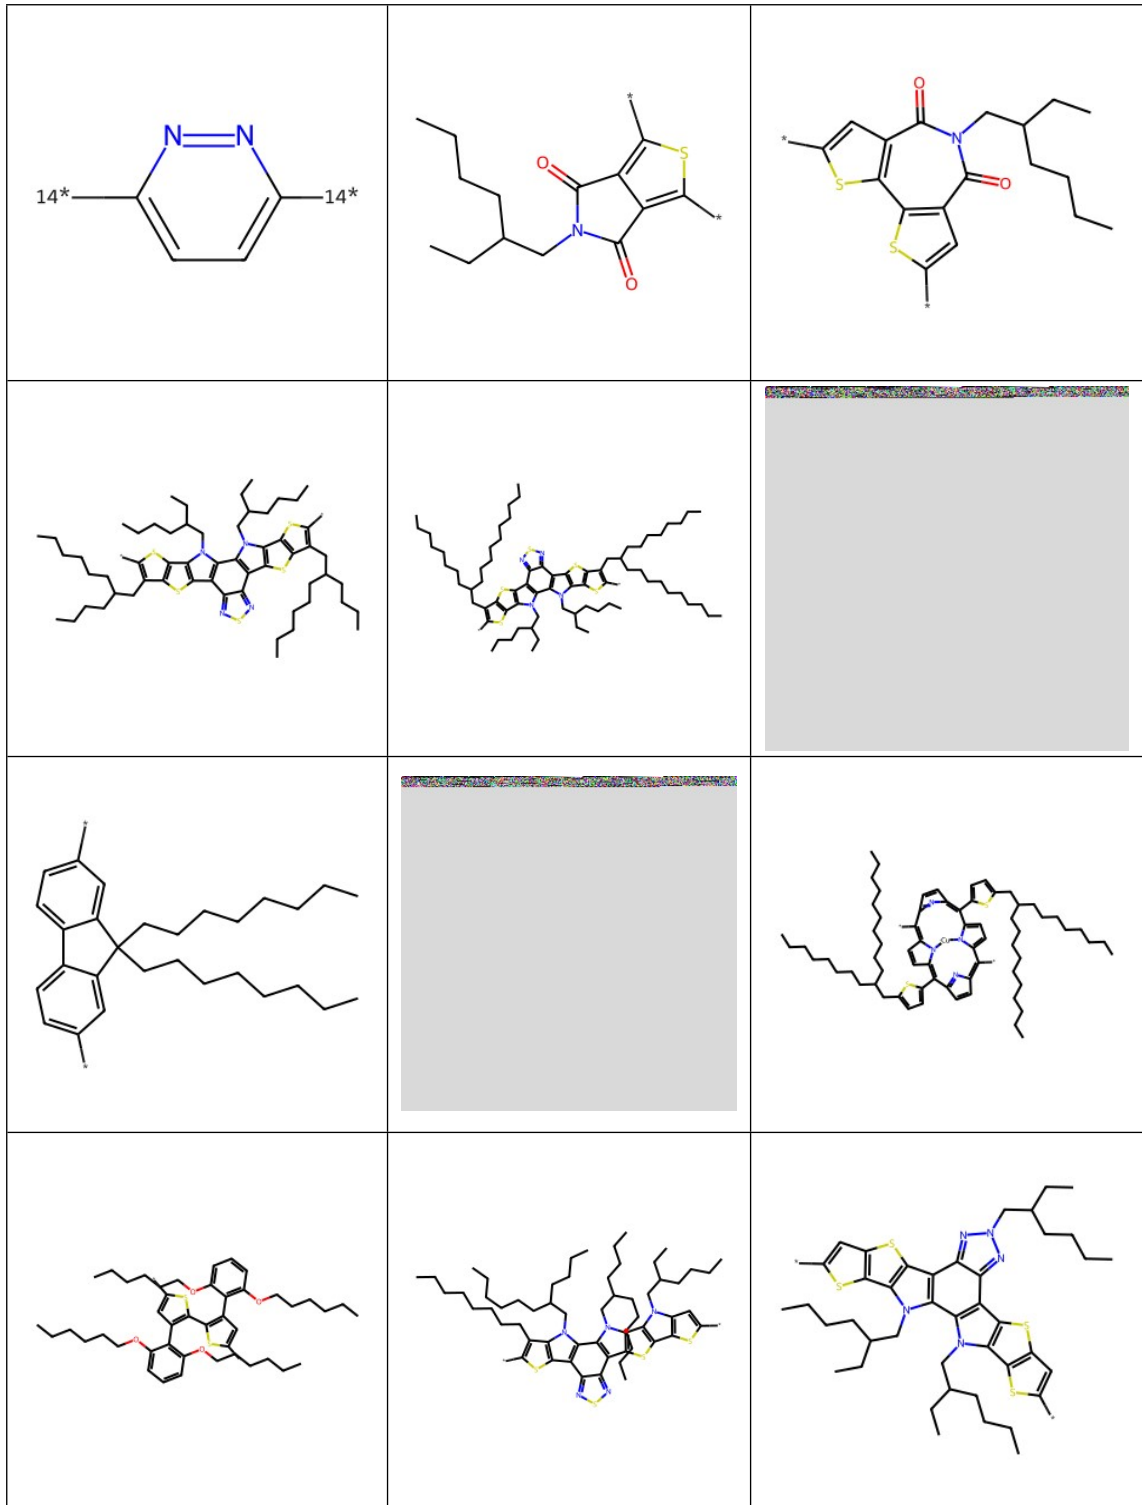

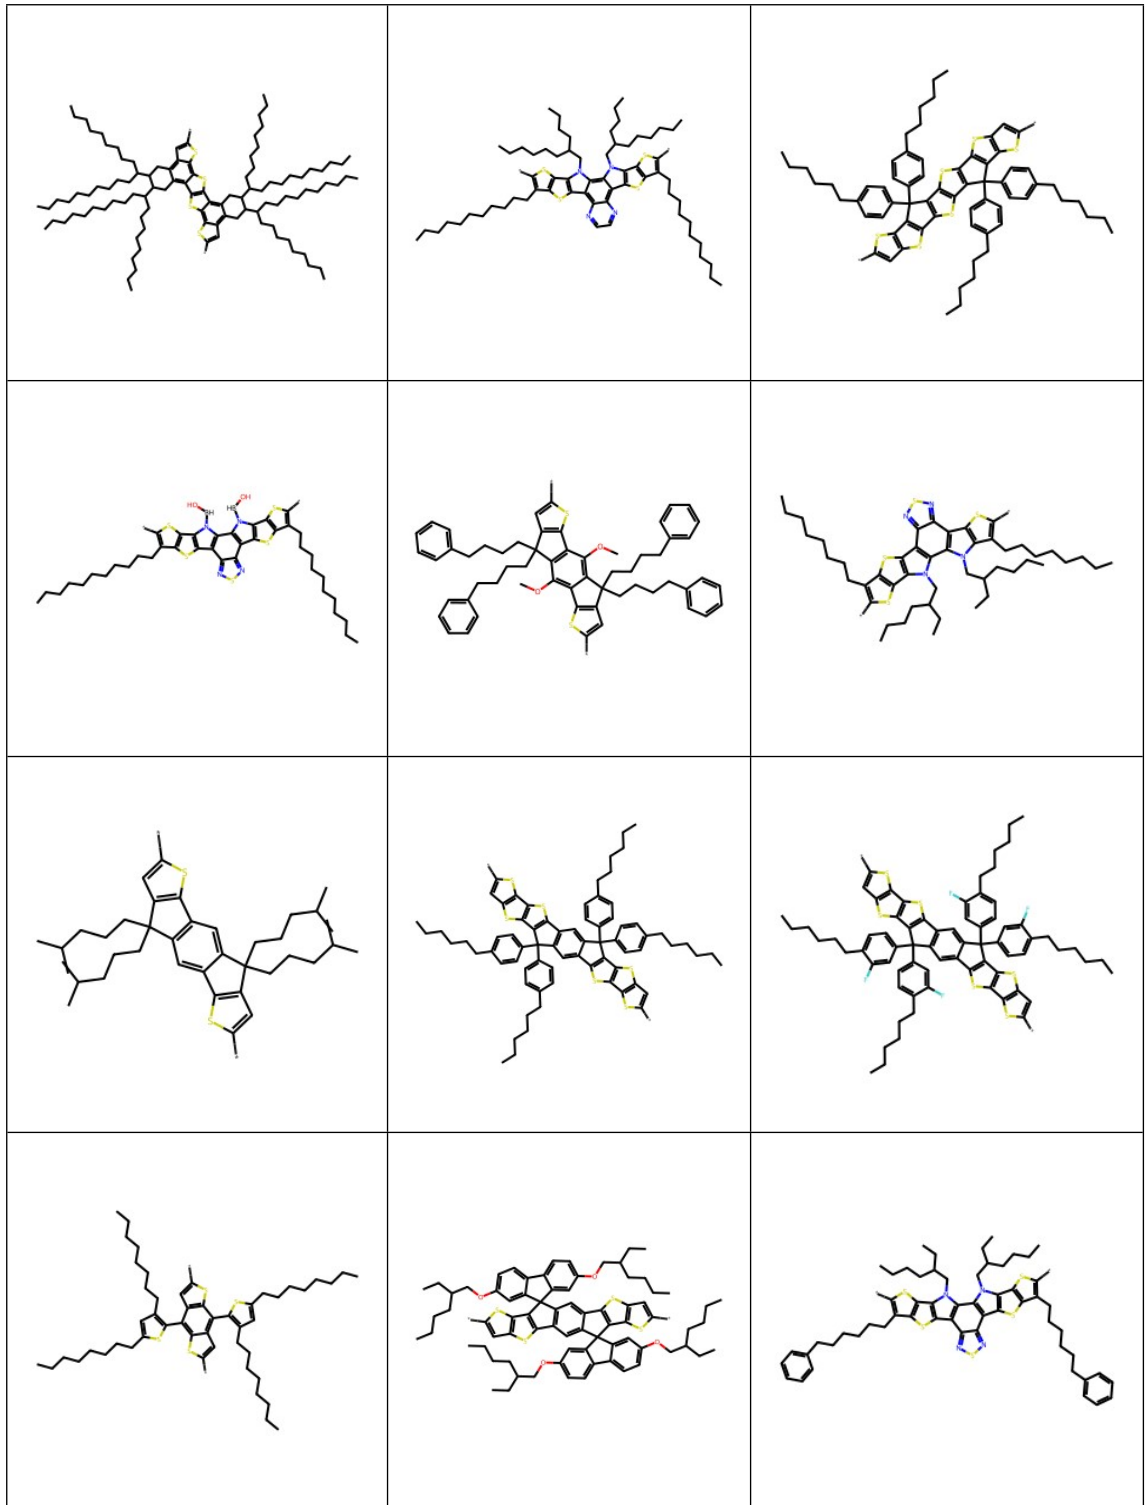

|                                                                                     |                                                                                     |                                                                                       |
|-------------------------------------------------------------------------------------|-------------------------------------------------------------------------------------|---------------------------------------------------------------------------------------|
| 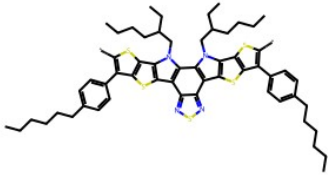   |    |    |
|    |    |    |
|  |  |  |
|  |  |  |



|                                                                                     |                                                                                     |                                                                                       |
|-------------------------------------------------------------------------------------|-------------------------------------------------------------------------------------|---------------------------------------------------------------------------------------|
| 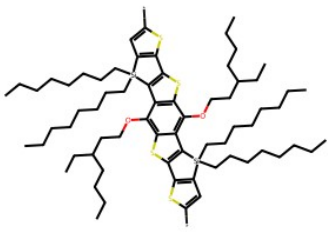   |    |    |
|    |    |    |
|  |  |  |
|  |                                                                                     |                                                                                       |
| $\pi$                                                                               |                                                                                     |                                                                                       |

|                                                                                     |                                                                                     |                                                                                       |
|-------------------------------------------------------------------------------------|-------------------------------------------------------------------------------------|---------------------------------------------------------------------------------------|
| 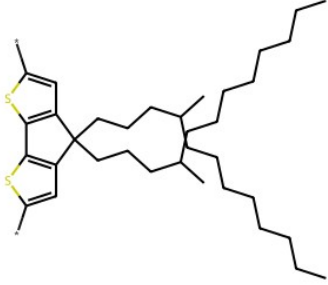   |    |    |
|    |    |    |
|  |   |  |
|  |  |  |

|                                                                                     |                                                                                     |                                                                                       |
|-------------------------------------------------------------------------------------|-------------------------------------------------------------------------------------|---------------------------------------------------------------------------------------|
| 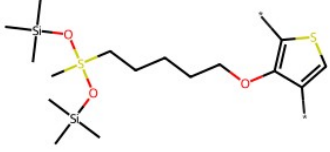   |    |    |
|    |    |    |
|  |   |  |
|  |  |                                                                                       |
| <p>A</p>                                                                            |                                                                                     |                                                                                       |

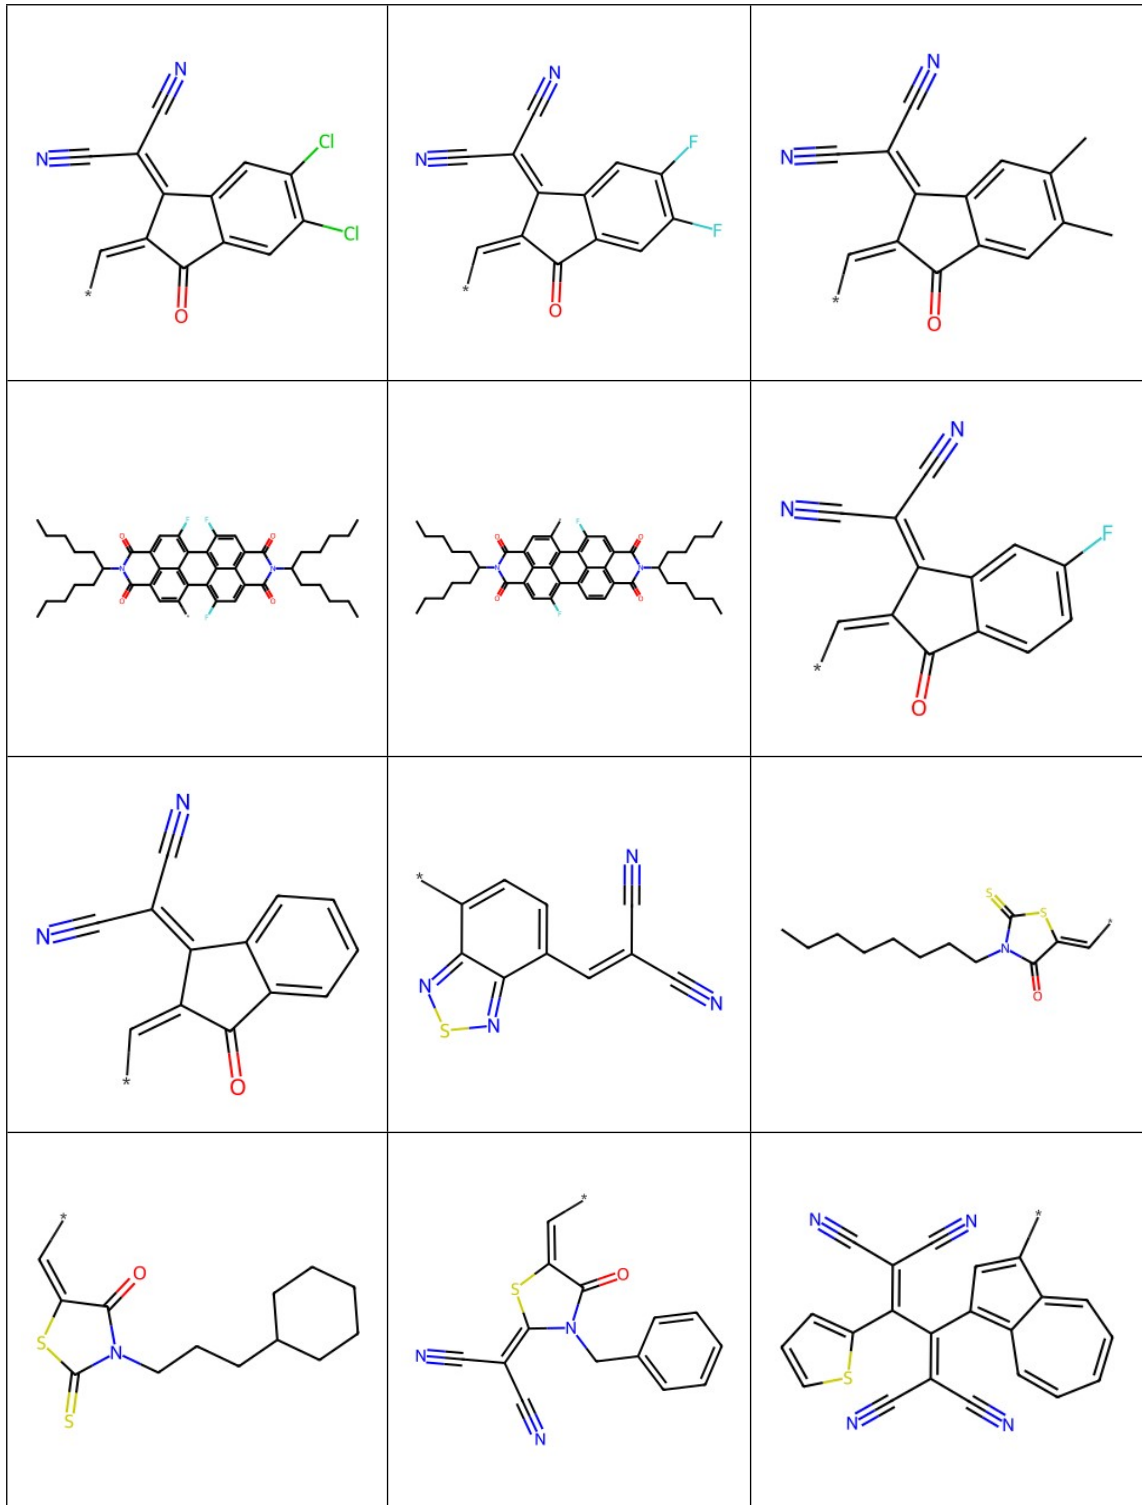

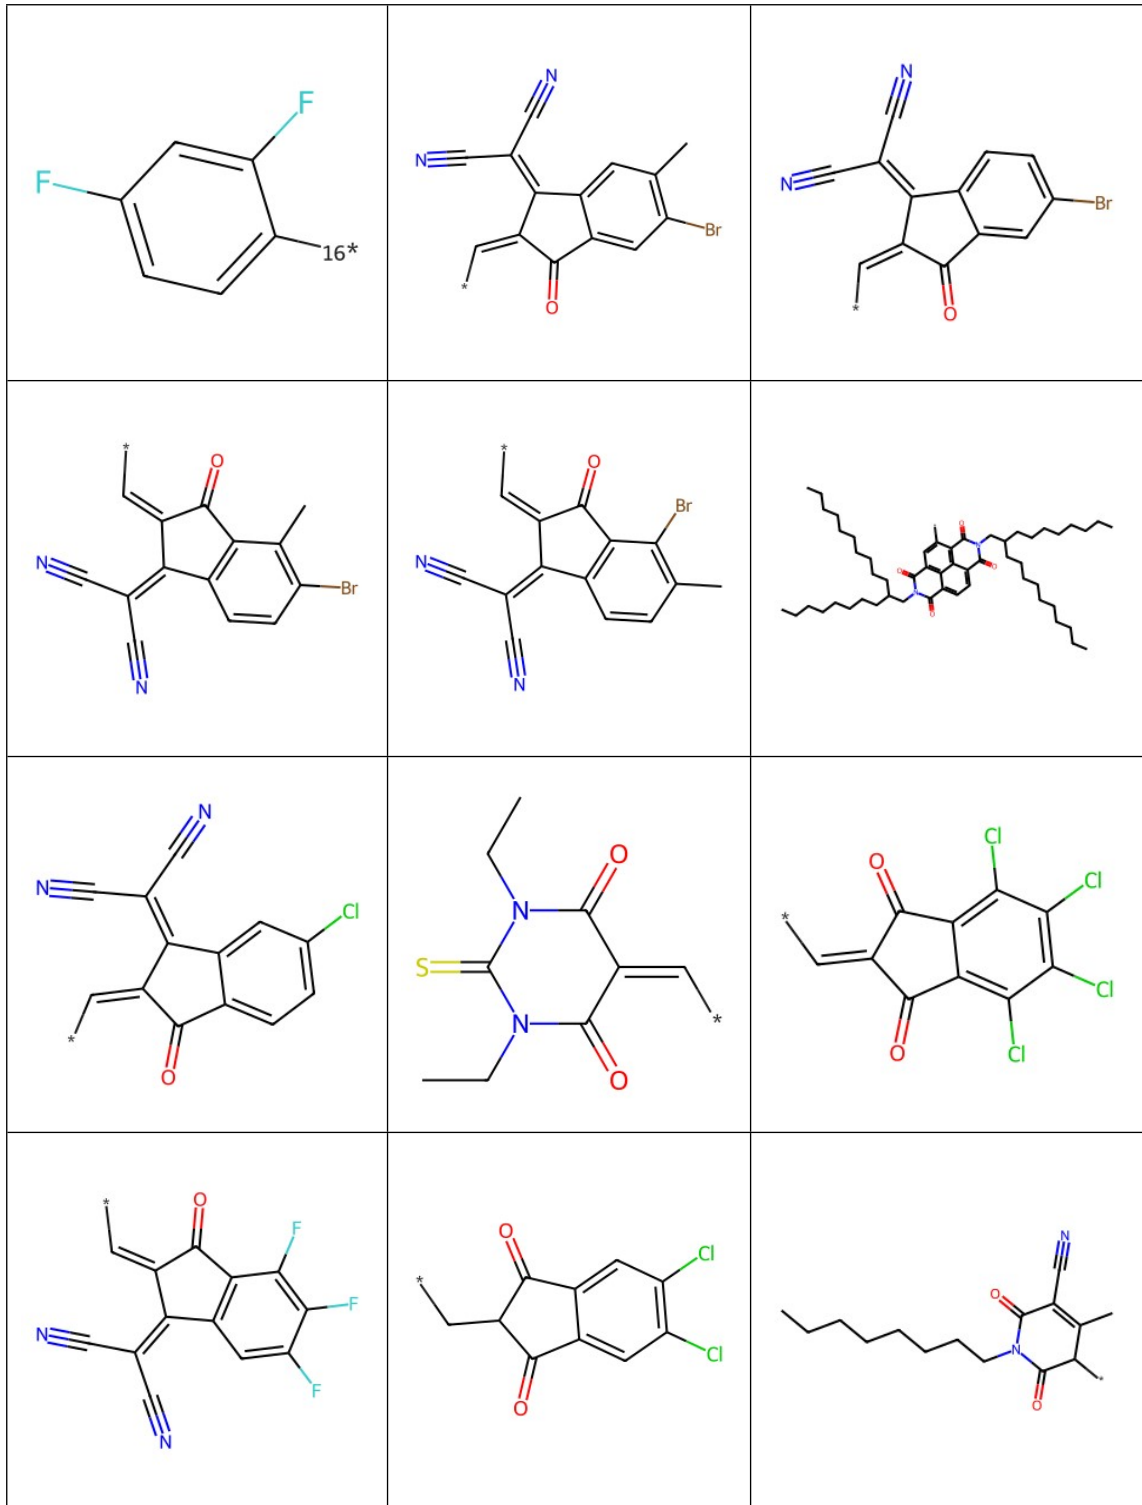



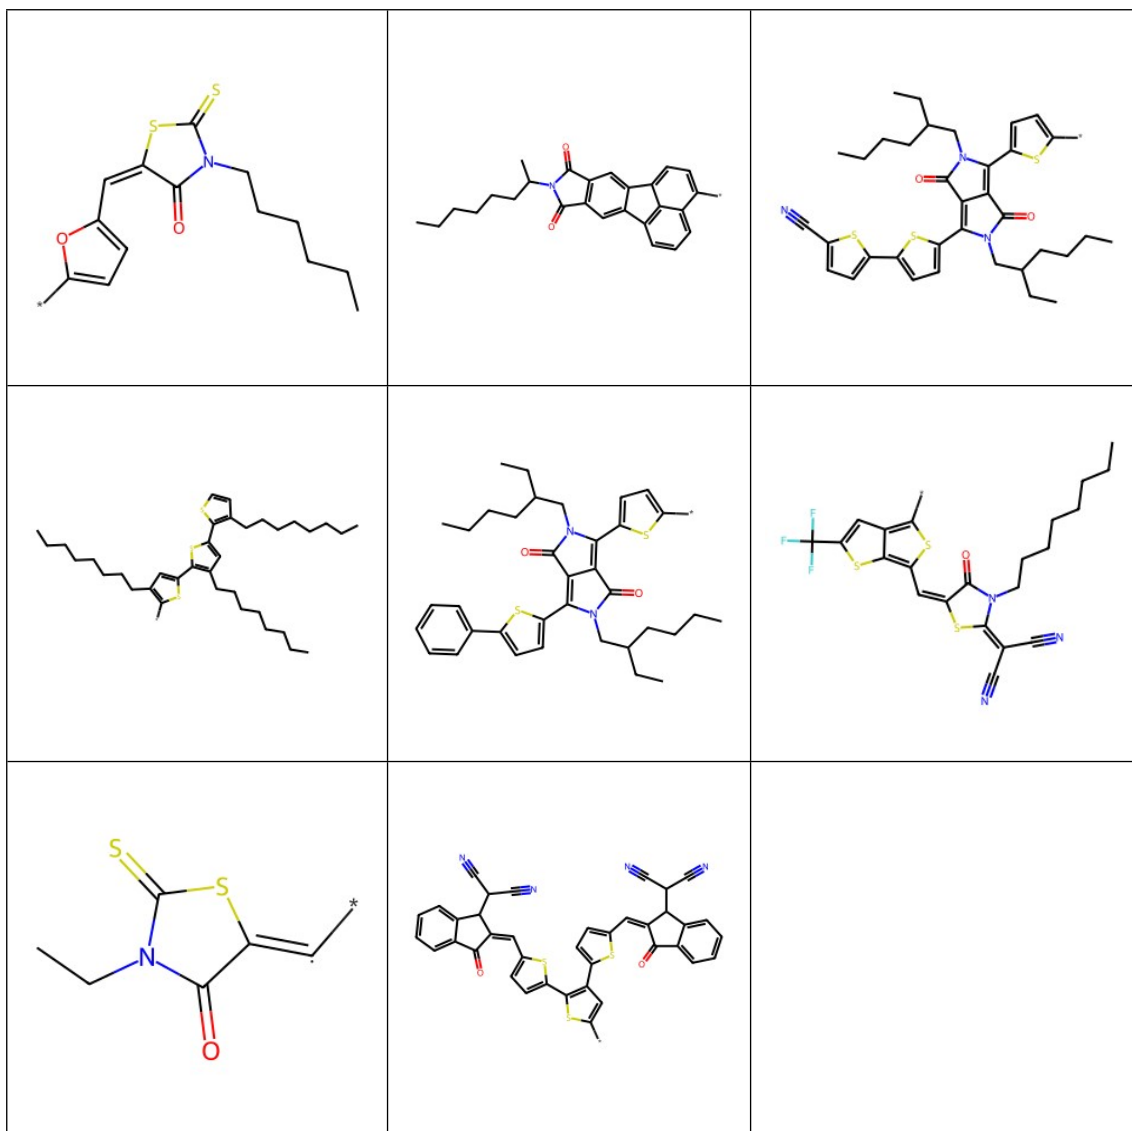

**Fig. S5** Fragments of acceptor molecules

**Table S1** Acceptor descriptors used for LSTM model

| descriptors               | resolve                                                                                         | photograph                                                                            |
|---------------------------|-------------------------------------------------------------------------------------------------|---------------------------------------------------------------------------------------|
| NOCount_A                 | Number of nitro groups contained in the acceptor molecule                                       | 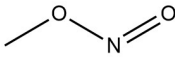   |
| NumAliphaticCarbocycles_A | Number of alicyclic alkyl rings in the acceptor molecule                                        |    |
| NumAliphaticRings_A       | Number of alicycles in the acceptor molecule                                                    |    |
| NumAromaticCarbocycles_A  | Number of aromatic cycloalkyl rings in the acceptor molecule                                    |    |
| NumAromaticHeterocycles_A | Number of aromatic heterocycles in the acceptor molecule                                        |   |
| NumHAcceptors_A           | Number of hydrogen bond receptors (usually nitrogen, oxygen or sulfur) in the acceptor molecule |                                                                                       |
| NumHeteroatoms_A          | Number of heteroatoms in the acceptor molecule                                                  |                                                                                       |
| NumRotatableBonds_A       | Number of rotatable chemical bonds in the acceptor molecule                                     |                                                                                       |
| fr_Ar_N_A                 | Number of nitrogen atom groups in the aromatic ring in the acceptor                             |  |
| fr_C_O_A                  | Number of carbon-oxygen double bonds in the acceptor                                            |  |



|                    |                                                               |                                                                                       |
|--------------------|---------------------------------------------------------------|---------------------------------------------------------------------------------------|
| fr_NH0_A           | Number of amino groups without hydrogen atoms in the acceptor | 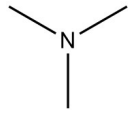   |
| fr_allylic_oxid_A  | Number of allyl oxide groups in the acceptor                  |    |
| fr_aryl_methyl_A   | Number of arylmethyl groups in the acceptor                   |    |
| fr_bicyclic_A      | Number of two or more rings in the acceptor                   |    |
| fr_halogen_A       | Number of halogen groups in the acceptor                      |                                                                                       |
| fr_ketone_A        | Number of ketone groups in the acceptor                       |   |
| fr_nitrile_A       | Number of nitrile groups in the acceptor                      |  |
| fr_thiophene_A     | Number of thiophene rings in the acceptor                     |  |
| fr_unbrch_alkane_A | Number of unbranched aliphatic groups in the acceptor         |  |

**Table S2** Donor descriptors used for LSTM model

| descriptors               | resolve                                                | photograph                                                                            |
|---------------------------|--------------------------------------------------------|---------------------------------------------------------------------------------------|
| NOCount_D                 | Number of nitro groups contained in the donor molecule | 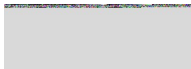 |
| NumAliphaticCarbocycles_D | Number of alicyclic alkyl rings in the donor molecule  |  |
| NumAliphaticRings_D       | Number of alicycles in the donor molecule              |  |

|                          |                                                                     |                                                                                       |
|--------------------------|---------------------------------------------------------------------|---------------------------------------------------------------------------------------|
| NumAromaticCarbocycles_D | Number of aromatic cycloalkyl rings in the donor molecule           | 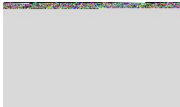   |
| RingCount_D              | Number of rings contained in the donor molecule                     |                                                                                       |
| fr_C_O_D                 | Number of carbon-oxygen double bonds in the donor molecule          |    |
| fr_NH0_D                 | Number of amino groups without hydrogen atoms in the donor molecule |    |
| fr_bicyclic_D            | Number of two or more rings in the donor molecule                   |    |
| fr_ether                 | Number of ether groups in the donor molecule                        |   |
| fr_halogen_D             | Number of halogen groups in the donor molecule                      |                                                                                       |
| fr_unbrch_alkane_D       | Number of unbranched aliphatic groups in the donor molecule         |  |

**Table S3** Hyperparameters of the LSTM model for PCE,  $V_{OC}$ ,  $J_{SC}$ , and FF predictions

| Device parameters | Hyperparameters |
|-------------------|-----------------|
|-------------------|-----------------|

---

PCE  
hidden\_size : 150  
num\_layers : 1  
batch\_size : 60  
l2\_factor : 0.01  
lr : 0.0001  
dropout : 0.1  
patience : 40  
optimizer : Adam

---

J<sub>sc</sub>  
hidden\_size : 90  
num\_layers : 1  
batch\_size : 310  
l2\_factor : 0.1  
lr : 0.01  
dropout : 0.1  
patience : 10  
optimizer : Adam

---

V<sub>oc</sub>  
hidden\_size : 220  
num\_layers : 1  
batch\_size : 10  
l2\_factor : 0.001  
lr : 0.0001  
dropout : 0.2  
patience : 30  
optimizer : Adam

---

FF  
hidden\_size : 90  
num\_layers : 1  
batch\_size : 220  
l2\_factor : 0.1  
lr : 0.01  
dropout : 0.1  
patience : 10  
optimizer : Adam

---

**Table S4**  $V_{OC}$ ,  $J_{SC}$ , and FF predictions for five donor-acceptor pairs within the database using the trained LSTM model

| D: A                                           | PM6:L8-BO | PB[N][F]:<br>Y6 | PM6:Y18 | PTB7-Th:<br>DTC-F-F | PBDB-T:sp-<br>mOEh-ITIC |
|------------------------------------------------|-----------|-----------------|---------|---------------------|-------------------------|
| Experimental $V_{OC}$ (V)                      | 0.88      | 0.85            | 0.84    | 0.84                | 0.87                    |
| Predictive $V_{OC}$ (V)                        | 0.86      | 0.79            | 0.88    | 0.82                | 0.88                    |
| $V_{OC}$ Absolute Error (V)                    | 0.02      | 0.06            | 0.04    | 0.02                | 0.01                    |
| Experimental $J_{SC}$ (mA cm <sup>-2</sup> )   | 26.49     | 25.00           | 24.91   | 16.01               | 12.13                   |
| Predictive $J_{SC}$ (mA cm <sup>-2</sup> )     | 23.47     | 24.08           | 24.46   | 12.57               | 11.30                   |
| $J_{SC}$ Absolute Error (mA cm <sup>-2</sup> ) | 3.02      | 0.92            | 0.45    | 3.44                | 0.83                    |
| Experimental FF (%)                            | 78.92     | 68.10           | 76.40   | 56.00               | 61.00                   |
| Predictive FF (%)                              | 68.87     | 68.19           | 67.96   | 54.03               | 61.23                   |
| FF Absolute Error (%)                          | 10.05     | 0.09            | 8.44    | 1.97                | 0.23                    |

**Table S5**  $V_{OC}$ ,  $J_{SC}$ , and FF predictions for five donor-acceptor pairs outside the database using the trained LSTM model

| D: A                                           | D18:L8-BO | PTQ10:<br>ITIC-4F | PTB7-Th:<br>Y6 | PM6:ID-<br>C6Ph-4F | PffBT4T-<br>2OD:P(4CF<br>8CH-PDI-<br>TT) |
|------------------------------------------------|-----------|-------------------|----------------|--------------------|------------------------------------------|
| Experimental $V_{OC}$ (V)                      | 0.90      | 0.95              | 0.69           | 0.84               | 0.74                                     |
| Predictive $V_{OC}$ (V)                        | 0.81      | 0.79              | 0.79           | 0.86               | 0.86                                     |
| $V_{OC}$ Absolute Error (V)                    | 0.09      | 0.16              | 0.10           | 0.02               | 0.12                                     |
| Experimental $J_{SC}$ (mA cm <sup>-2</sup> )   | 25.10     | 19.81             | 23.40          | 17.47              | 8.72                                     |
| Predictive $J_{SC}$ (mA cm <sup>-2</sup> )     | 22.12     | 17.55             | 23.11          | 18.84              | 8.73                                     |
| $J_{SC}$ Absolute Error (mA cm <sup>-2</sup> ) | 2.98      | 2.26              | 0.29           | 1.37               | 0.01                                     |
| Experimental FF (%)                            | 71.20     | 61.00             | 67.80          | 73.22              | 52.99                                    |
| Predictive FF (%)                              | 65.54     | 62.19             | 64.48          | 65.65              | 43.42                                    |
| FF Absolute Error (%)                          | 5.66      | 1.19              | 3.32           | 7.57               | 9.57                                     |
